# Supplementary material for: A Novel Tumor suppressor network in squamous malignancies
Source: PubMed Central journal article supplement — Sci Rep. 2012 Nov 9;2:828. doi: 10.1038/srep00828 (PMC3494016; doi:10.1038/srep00828), 2012-11-09
Supplement: srep00828-s1.pdf [file srep00828-s1.pdf]

## Supplementary information

# A Novel Tumor suppressor network in squamous malignancies

Clotilde Costa<sup>1</sup>, Mirentxu Santos<sup>1</sup>, Carmen Segrelles<sup>1</sup>, Marta Dueñas<sup>1</sup>, M Fernanda Lara<sup>1,2</sup>, Xabier Agirre<sup>3</sup>, Felipe Prosper<sup>3</sup>, Ramón García-Escudero<sup>1</sup> and Jesús M. Paramio<sup>1,\*</sup>

1.-Molecular Oncology Unit, Department of Basic Research, CIEMAT (Ed 70A), Ave Complutense 40. 28040 Madrid (Spain)

2.- Present Address: Departments of Pediatrics and the Program in Molecular Imaging, Stanford University, Stanford, CA

3.- Center for Applied Medical Research, University of Navarra, Ave. Pío XII, 55 E-31008 Pamplona Spain

\* Corresponding Author [jesusm.paramio@ciemat.es](mailto:jesusm.paramio@ciemat.es)

Running Title: Functional connection between p107, pRb, Pten and p53 in squamous tumors

## Supplementary figures

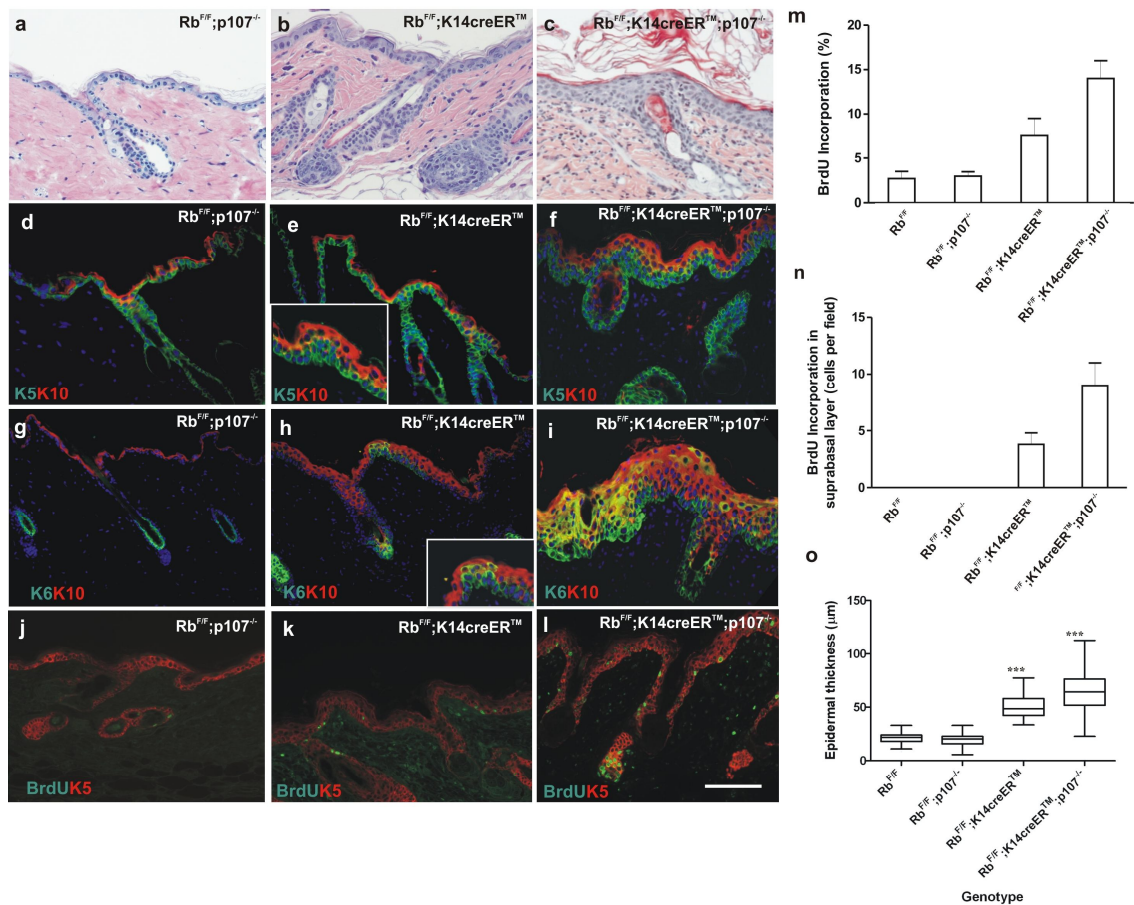

### Supplementary Figure 1. Differentiation and proliferation analysis in

**Rb<sup>F/F</sup>;K14creER<sup>TM</sup>;p107<sup>-/-</sup> mouse skin.** a-c) H&E stained sections of skin of the quoted genotypes. d-l) Representative immunofluorescence of K5 (green) and K10 (red) (d-f); K6 (green) and K10 (red) (g-i); K5 (red) and BrdU incorporation (green) (j-l) of the quoted genotypes. m, n) BrdU incorporation in percentage in basal cells (m) and in suprabasal layer (cells per field) (n) of the quoted genotypes. o) Epidermal thickness (µm) measure in three sections per mice (n=5) of the quoted genotypes; are shown as mean ± s.e.m. Bars= 150µm

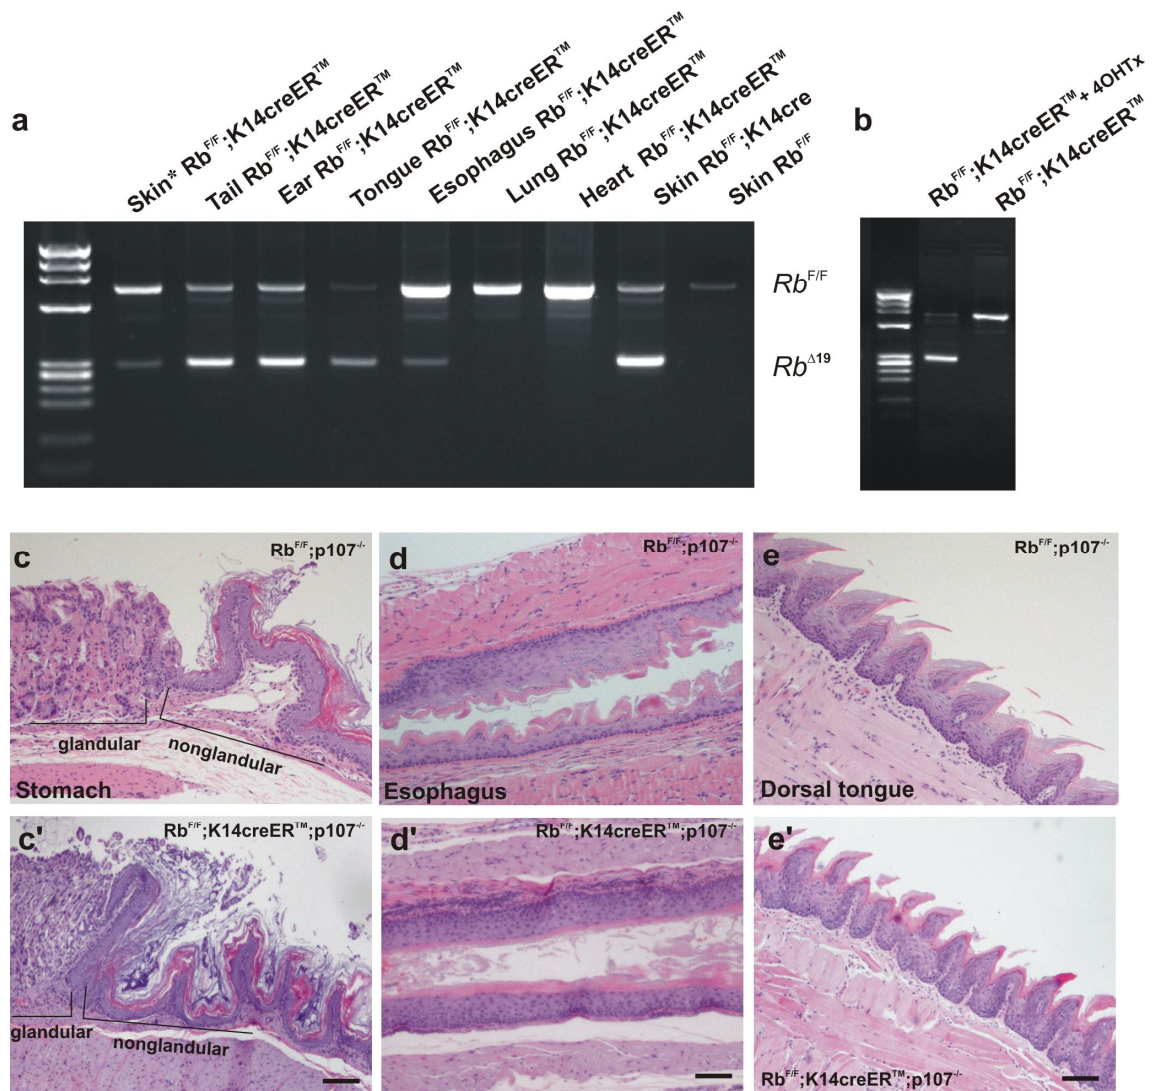

**Supplementary Figure 2. Topical tamoxifen treatment induces recombination in untreated areas.** a, b) Representative PCR analysis of *Rb1* deletion in different tissues (a) or primary keratinocytes (b) of the quoted genotypes. *Rb1* deletion is represented as  $Rb^{\Delta 19}$ . \* DNA sample from an untreated area of a tamoxifen treated mouse backskin. Of note, K14 promoter is not expressed in lung and heart. c-e') Absence of gross phenotypic changes in specific K14-expressing tissues after recombination. c-e) control ( $Rb^{F/F}; p107^{-/-}$ ) and (c'- e')  $Rb^{F/F}; K14creER^{TM}; p107^{-/-}$  mouse samples from stomach (c, c'), esophagus (d, d') and dorsal tongue (e-e'). Bars= 150 $\mu$ m



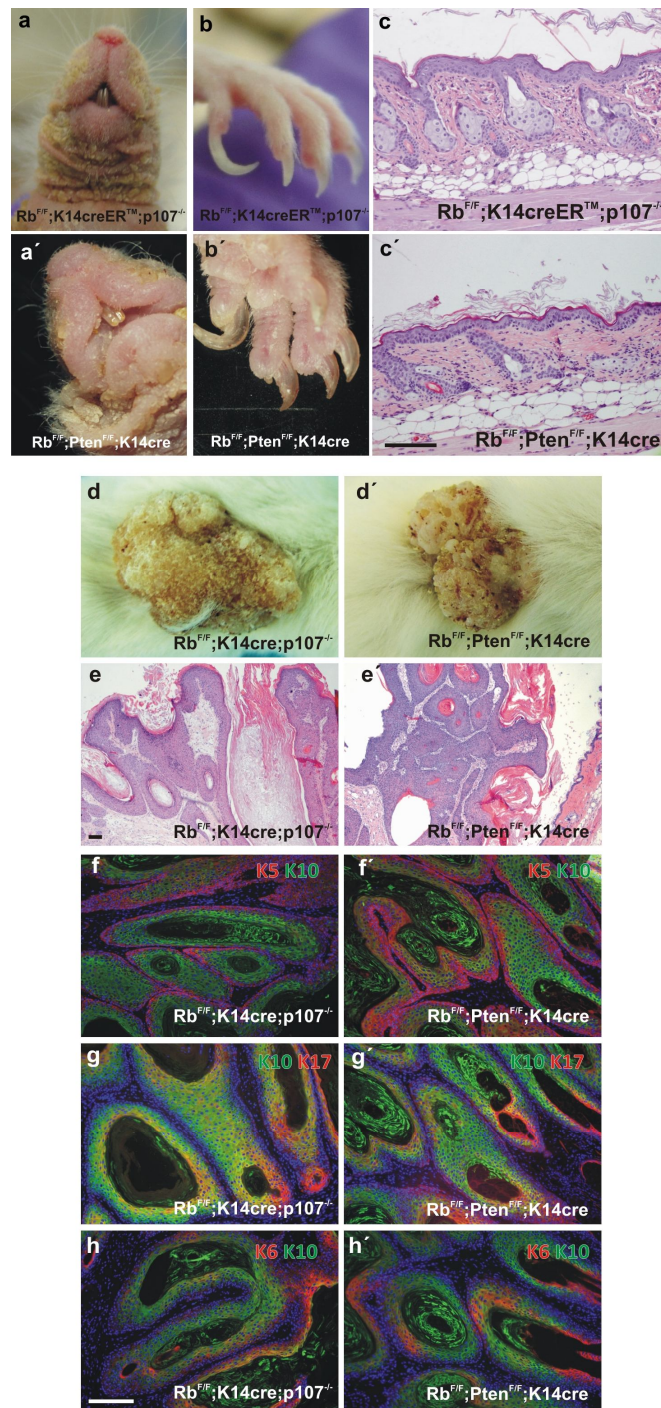

**Supplementary Figure 3.  $Rb^{F/F};K14creER^{TM};p107^{-/-}$  mouse phenotype resembles  $Rb^{F/F};Pten^{F/F};K14cre$  mice.** External aspect of ventral neck area (a, a'); abnormal growth of nails (b, b') and H&E stained skin section (c, c') showing hyperplasia, hyperkeratosis and inflammatory infiltrate in  $Rb^{F/F};K14creER^{TM};p107^{-/-}$  (a, b, c) and  $Rb^{F/F};Pten^{F/F};K14cre$  (a', b', c') mice. d, d') Spontaneous squamous carcinomas from new born skin from  $Rb^{F/F};K14cre;p107^{-/-}$  (d) and  $Rb^{F/F};Pten^{F/F};K14cre$  (d') mice transplanted

in immunodeficient mice. e, e') H&E stained section of the carcinomas from  $Rb^{F/F};K14cre;p107^{-/-}$  (e) and  $Rb^{F/F};Pten^{F/F};K14cre$  (e'). f-h') Representative immunofluorescence of K5 (red) and K10 (green) (f, f'); K10 (green) and K17 (red) (g, g'); K6 (red) and K10 (green) (h, h') of the quoted genotypes. Bars= 150 $\mu$ m

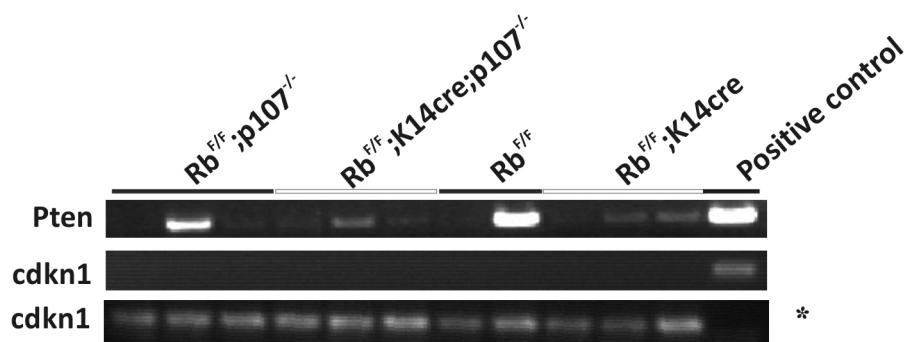

**Supplementary Figure 4. Pten gene methylation analysis.** Methylation Specific PCR for *Pten* and *cdkn1* gene promoters in DNA samples from new born skin of mice of the quoted genotype. \* Control Unmethylated *cdkn1* gene.

Supp Table S3

Overlapping between Overexpressed genes (n=855) in RbF/F;K14CreERTM;p107-/- mouse tumors and human SCC Samples under the Concept Over-expression tumor vs. normal tissue from Oncomine

| Concept Name                                                                                                 | Overlap | p-Value  | q-Value  | Odds Ratio | Dataset             |
|--------------------------------------------------------------------------------------------------------------|---------|----------|----------|------------|---------------------|
| Squamous Cell Lung Carcinoma vs. Normal - Top 10% Over-expressed (Hou Lung)                                  | 276     | 5.01E-80 | 2.87E-76 | 5.1        | Hou Lung            |
| Cervical Cancer vs. Normal - Top 10% Over-expressed (Pyeon Multi-cancer)                                     | 232     | 2.02E-51 | 1.48E-48 | 3.9        | Pyeon Multi-cancer  |
| Nasopharyngeal Carcinoma vs. Normal - Top 10% Over-expressed (Sengupta Head-Neck)                            | 219     | 5.20E-44 | 2.28E-41 | 3.5        | Sengupta Head-Neck  |
| Cervical Squamous Cell Carcinoma vs. Normal - Top 5% Over-expressed (Scotto Cervix 2)                        | 118     | 1.24E-36 | 3.29E-34 | 5          | Scotto Cervix 2     |
| Floor of the Mouth Carcinoma vs. Normal - Top 10% Over-expressed (Pyeon Multi-cancer)                        | 201     | 1.41E-34 | 3.27E-32 | 3.1        | Pyeon Multi-cancer  |
| Oral Cavity Carcinoma vs. Normal - Top 10% Over-expressed (Pyeon Multi-cancer)                               | 200     | 4.40E-34 | 9.83E-32 | 3.1        | Pyeon Multi-cancer  |
| Cervical Squamous Cell Carcinoma Epithelia vs. Normal - Top 5% Over-expressed (Zhai Cervix)                  | 114     | 6.97E-34 | 1.54E-31 | 4.7        | Zhai Cervix         |
| Squamous Cell Lung Carcinoma vs. Normal - Top 10% Over-expressed (Wachi Lung)                                | 167     | 1.68E-32 | 3.44E-30 | 3.4        | Wachi Lung          |
| Squamous Cell Lung Carcinoma vs. Normal - Top 10% Over-expressed (Garber Lung)                               | 145     | 1.11E-28 | 1.87E-26 | 3.5        | Garber Lung         |
| Tongue Squamous Cell Carcinoma vs. Normal - Top 10% Over-expressed (Ye Head-Neck)                            | 188     | 2.18E-28 | 3.60E-26 | 2.8        | Ye Head-Neck        |
| Squamous Cell Lung Carcinoma vs. Normal - Top 10% Over-expressed (Bhattacharjee Lung)                        | 123     | 4.94E-28 | 8.07E-26 | 3.9        | Bhattacharjee Lung  |
| Tongue Squamous Cell Carcinoma vs. Normal - Top 10% Over-expressed (Estilo Head-Neck)                        | 122     | 2.40E-27 | 3.69E-25 | 3.8        | Estilo Head-Neck    |
| Tongue Squamous Cell Carcinoma vs. Normal - Top 10% Over-expressed (Talbot Lung)                             | 120     | 3.49E-26 | 4.97E-24 | 3.7        | Talbot Lung         |
| Cervical Squamous Cell Carcinoma vs. Normal - Top 10% Over-expressed (Biewenga Cervix)                       | 176     | 1.57E-22 | 1.83E-20 | 2.5        | Biewenga Cervix     |
| Thyroid Gland Undifferentiated (Anaplastic) Carcinoma vs. Normal - Top 10% Over-expressed (Giordano Thyroid) | 141     | 7.65E-20 | 7.65E-18 | 2.7        | Giordano Thyroid    |
| Tongue Carcinoma vs. Normal - Top 10% Over-expressed (Pyeon Multi-cancer)                                    | 167     | 1.48E-19 | 1.47E-17 | 2.4        | Pyeon Multi-cancer  |
| Oropharyngeal Carcinoma vs. Normal - Top 10% Over-expressed (Pyeon Multi-cancer)                             | 164     | 2.04E-18 | 1.88E-16 | 2.4        | Pyeon Multi-cancer  |
| Squamous Cell Lung Carcinoma vs. Normal - Top 10% Over-expressed (Talbot Lung)                               | 103     | 3.17E-17 | 2.68E-15 | 3          | Talbot Lung         |
| Tonsillar Carcinoma vs. Normal - Top 10% Over-expressed (Pyeon Multi-cancer)                                 | 153     | 1.64E-14 | 1.11E-12 | 2.1        | Pyeon Multi-cancer  |
| Thyroid Gland Oncocytic Follicular Carcinoma vs. Normal - Top 10% Over-expressed (Giordano Thyroid)          | 116     | 2.03E-10 | 9.98E-09 | 2.1        | Giordano Thyroid    |
| Tall Cell Variant Thyroid Gland Papillary Carcinoma vs. Normal - Top 10% Over-expressed (Giordano Thyroid)   | 113     | 1.74E-09 | 7.84E-08 | 2          | Giordano Thyroid    |
| Follicular Variant Thyroid Gland Papillary Carcinoma vs. Normal - Top 5% Over-expressed (Giordano Thyroid)   | 64      | 1.18E-07 | 4.29E-06 | 2.2        | Giordano Thyroid    |
| Tongue Squamous Cell Carcinoma vs. Normal - Top 10% Over-expressed (Kuriakose Head-Neck)                     | 77      | 5.76E-07 | 1.92E-05 | 2          | Kuriakose Head-Neck |
| Squamous Cell Lung Carcinoma vs. Normal - Top 10% Over-expressed (Yamagata Lung)                             | 29      | 6.68E-04 | 0.012    | 2.2        | Yamagata Lung       |

Supp Table S4

Overlapping between Underexpressed genes (n=753) in RbF/F;K14CreERTM;p107-/- mouse tumors and human SCC Samples under the Concept Under-expression tumor vs. normal tissue from Oncomine

| Concept Name                                                                             | Overlap | P-Value  | Q-Value  | Odds Ratio | Dataset             |
|------------------------------------------------------------------------------------------|---------|----------|----------|------------|---------------------|
| Squamous Cell Lung Carcinoma vs. Normal - Top 10% Under-expressed (Hou Lung)             | 162     | 2.14E-22 | 1.58E-19 | 2.7        | Hou Lung            |
| Tongue Squamous Cell Carcinoma vs. Normal - Top 10% Under-expressed (Estilo Head-Neck)   | 111     | 3.64E-20 | 2.08E-17 | 3.2        | Estilo Head-Neck    |
| Cervical Squamous Cell Carcinoma vs. Normal - Top 10% Under-expressed (Biewenga Cervix)  | 145     | 1.47E-15 | 4.31E-13 | 2.3        | Biewenga Cervix     |
| Squamous Cell Lung Carcinoma vs. Normal - Top 10% Under-expressed (Wachi Lung)           | 116     | 1.11E-13 | 2.47E-11 | 2.4        | Wachi Lung          |
| Tongue Squamous Cell Carcinoma vs. Normal - Top 10% Under-expressed (Ye Head-Neck)       | 138     | 3.01E-13 | 6.32E-11 | 2.1        | Ye Head-Neck        |
| Tongue Squamous Cell Carcinoma vs. Normal - Top 10% Under-expressed (Talbot Lung)        | 91      | 3.27E-11 | 4.60E-09 | 2.4        | Talbot Lung         |
| Squamous Cell Lung Carcinoma vs. Normal - Top 10% Under-expressed (Garber Lung)          | 102     | 3.09E-10 | 3.53E-08 | 2.2        | Garber Lung         |
| Squamous Cell Lung Carcinoma vs. Normal - Top 10% Under-expressed (Bhattacharjee Lung)   | 88      | 3.89E-10 | 4.35E-08 | 2.3        | Bhattacharjee Lung  |
| Squamous Cell Lung Carcinoma vs. Normal - Top 10% Under-expressed (Talbot Lung)          | 82      | 5.28E-08 | 3.58E-06 | 2.1        | Talbot Lung         |
| Tongue Squamous Cell Carcinoma vs. Normal - Top 5% Under-expressed (Kuriakose Head-Neck) | 48      | 5.46E-07 | 2.89E-05 | 2.4        | Kuriakose Head-Neck |
